# Supplementary material
Source: PubMed Central journal article supplement (PMC4124726)
Supplement: NIHMS608666-supplement-Supplemental_Material.pdf [file NIHMS608666-supplement-Supplemental_Material.pdf]

## Supplemental Figures

Wan LQ, Kang SM, Eng G, Grayson WL, Lu XL, Huo B, Gimble J, Guo XE, Mow VC, Vunjak-Novakovic G. Geometric control of human stem cell morphology and differentiation. *Integr Biol (Camb)*. 2(7-8):346-353, 2010.

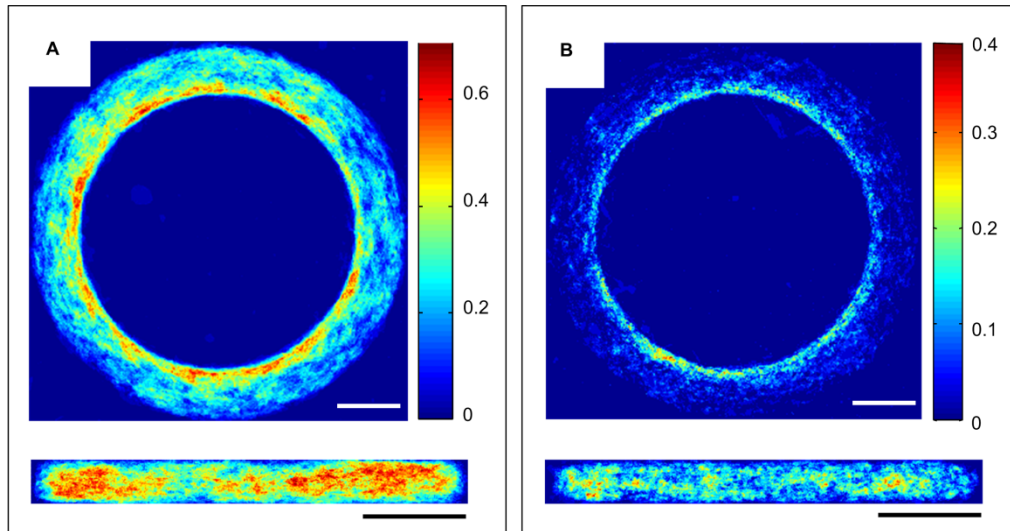

**Fig S1.** Frequency maps of osteogenic differentiation (A) and adipogenic differentiation (B) of human adipose-derived stem cells (hASCs) in 1:1 mixture of osteogenic and adipogenic media for 4 days. At the top are cells on rings with an inner diameter of 1000 $\mu\text{m}$  and a width of 200  $\mu\text{m}$ , and the bottom rectangles are 1000 $\mu\text{m}$  in length and 100 $\mu\text{m}$  in width. Scale bars: 200  $\mu\text{m}$ .

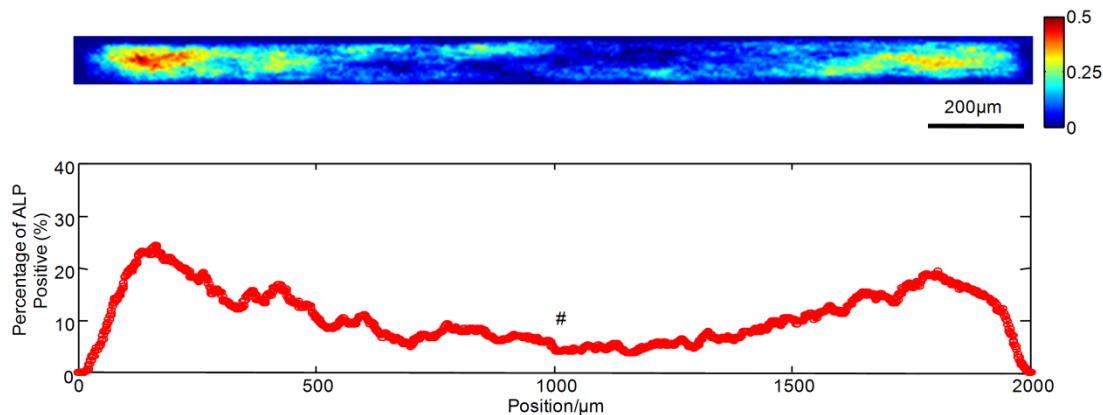

**Fig S2.** Alkaline phosphatase activity (ALP) of human adipose-derived stem cells (hASCs) on rectangles (2,000x100  $\mu\text{m}$ ) in osteogenic differentiation medium for 3 days. At the top is the frequency map and the corresponding average ALP activity along the length of each pattern is shown at the bottom. (# significantly different from the peak ALP near two ends in the same rectangle)
